# Supplementary material
Source: PubMed Central journal article supplement (PMC6066306)
Supplement: supp_RA117.000194_132738_2_supp_139879_p8vl28.pdf [file supp_RA117.000194_132738_2_supp_139879_p8vl28.pdf]

## Supplemental Figure legends

### Figure S1

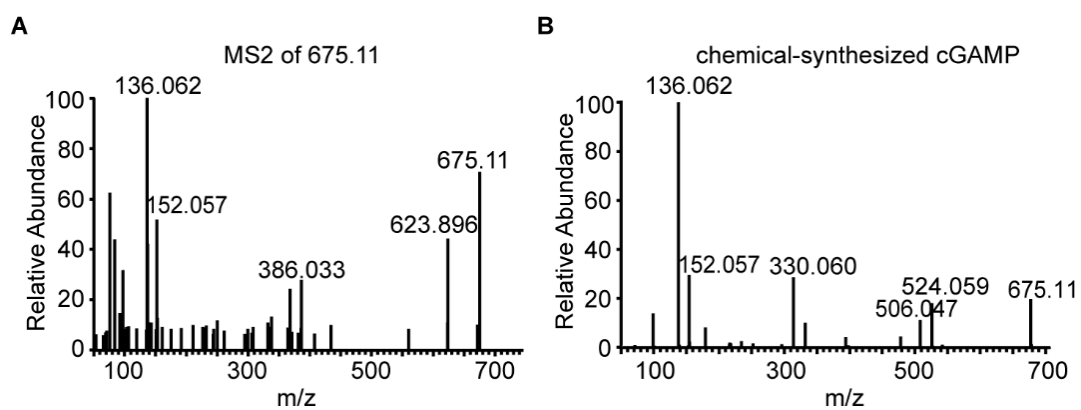

#### Figure S1. cGAMP was detected by full-scan LC-MS/MS.

The major ions in the CID MS2 spectra of the fragment of  $M/Z=675.11$  derived from BmNPV-infected cells (A) and chemically synthesized cGAMP (B).

**Figure S2**

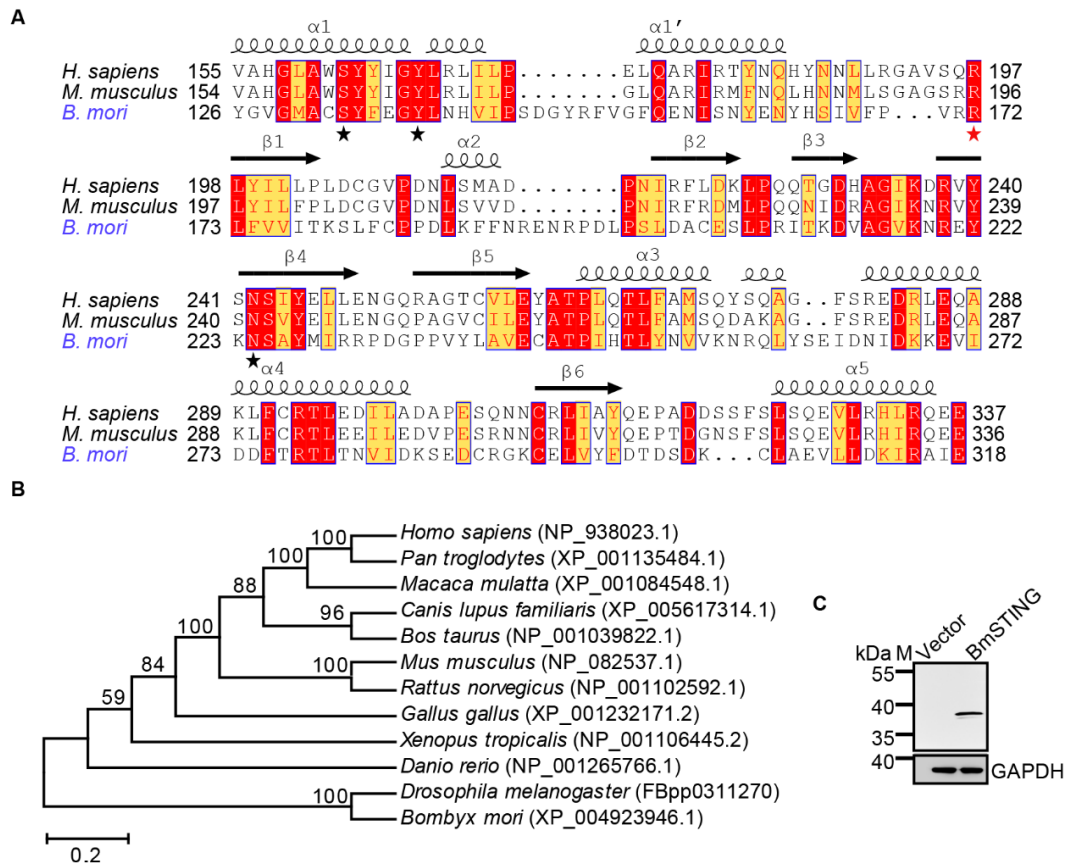

**Figure S2. Sequence alignment and phylogenetic tree construction.**

A, Multiple alignment of C terminus of STING sequences from *B. mori*<sub>126-318</sub>, *H. sapiens*<sub>155-337</sub> and *M. musculus*<sub>154-336</sub>. Identical positions are boxed in blue, strictly conservative positions in Red and block of similar residues in yellow. Black asterisks indicate residues directly involved in c-di-GMP and cGAMP binding; red asterisk indicates residue basis for the type I IFN expression. B, NJ phylogenetic tree of STINGs. The tree was based on multiple alignments of full-length STING amino-acid sequences from *B.mori* and other species. The tree is drawn to scale. C, BmSTING is a 37.9 kDa protein confirmed by immunoblot in BmE cells.

**Figure S3**

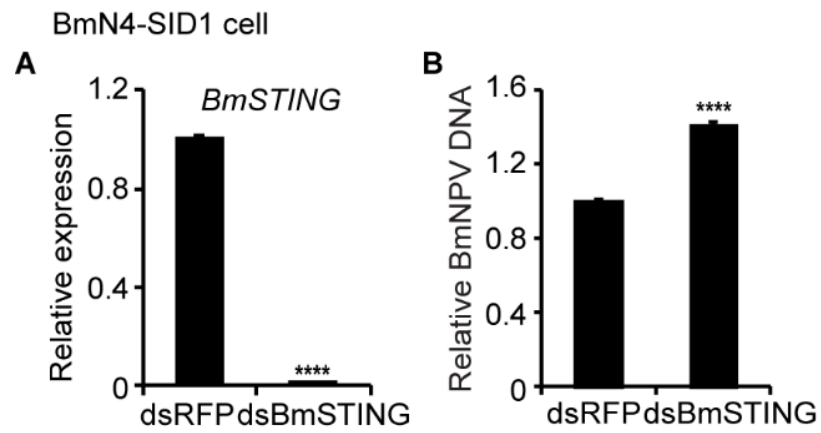

**Figure S3. The abundance of the virus in BmN4-SID1 cells with BmSTING RNAi.**

A, *BmSTING* mRNA level decreased after dsRNA transfection. B, Relative viral DNA level in cells treated with dsBmSTING or dsRFP determined by qRT-PCR.

**Figure S4**

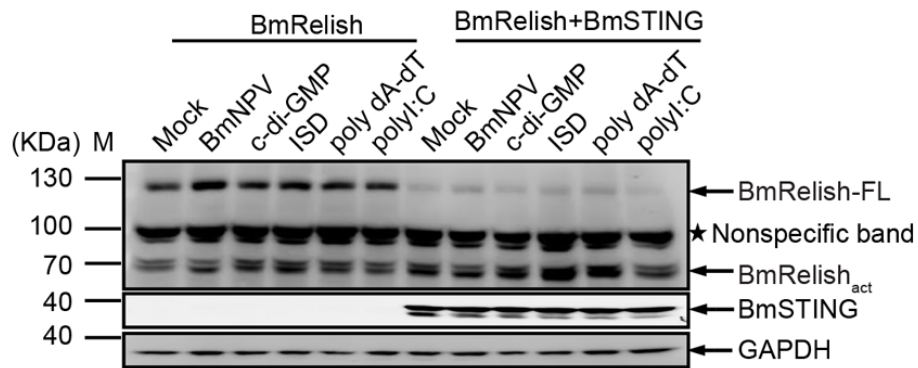

**Figure S4. BmSTING ligands mediated the processing of Relish in BmE cells.**

Cells overexpressing FL-Relish or co-overexpressing FL-Relish and BmSTING were stimulated with 3  $\mu\text{g/ml}$  ISD, poly(dA-dT), poly(I: C), c-di-GMP, or BmNPV-GFP. Cleavage of Relish (Relish<sub>act</sub>) was analyzed by immunoblotting.

**Figure S5**

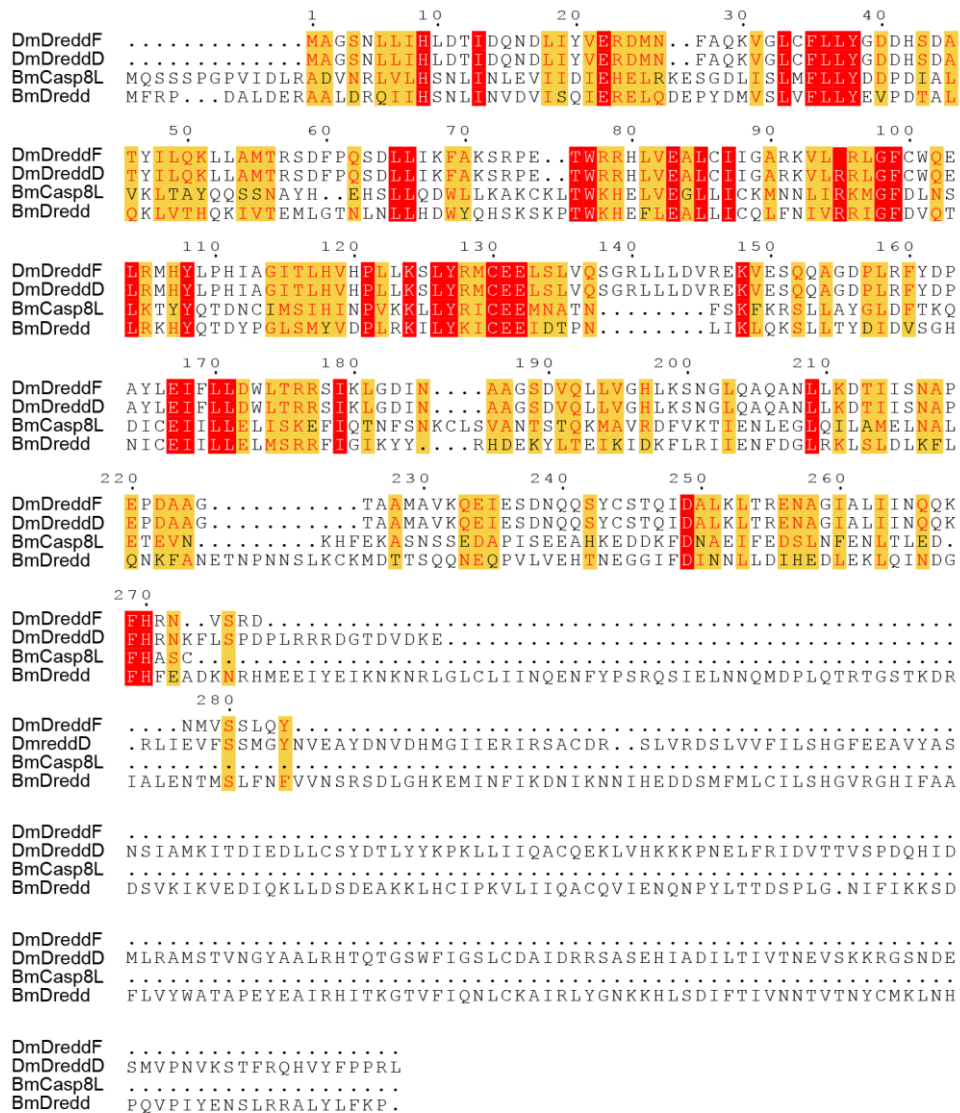

**Figure S5. Sequence alignment between Casp8L and Dredd of *B.mori* and *Drosophila*.**  
The amino acid sequences of BmCasp8L (XP\_012552745.1), BmDredd (NP\_001108337.1), DmDredd-F (NP\_477250.3) and DmDredd-D (NP\_477251.3) were aligned. Identical positions are boxed in red and strictly conservative positions in yellow.

**Figure S6**

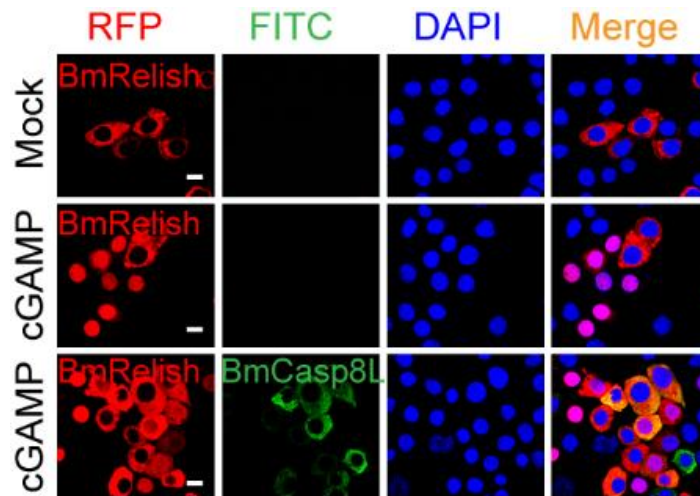

**Figure S6. The translocation of BmRelish induced by cGAMP was attenuated by BmCasp8L.**

BmE cells overexpressing BmRelish alone or co-expressing BmRelish and BmCasp8L were treated with cGAMP and subjected to fluorescence microscopic analysis (Scale bar = 10  $\mu$ m).

Figure S7

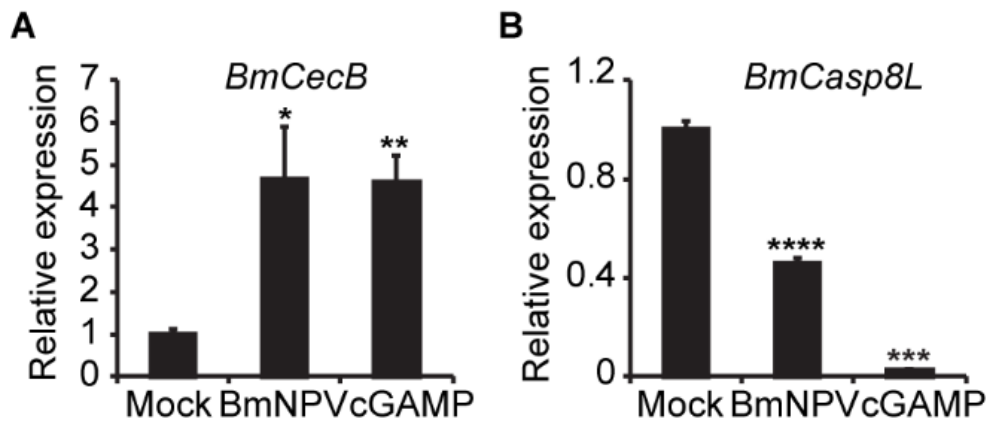

Figure S7. *BmCecB* was induced by BmNPV infection or cGAMP stimulation, but *BmCasp8L* was decreased.

BmE cells were treated with 3  $\mu\text{g/ml}$  cGAMP or infected with BmNPV-GFP, then the mRNA levels of *BmCecB* (A) and *BmCasp8L* (B) were analyzed by qRT-PCR. Data are presented as the mean  $\pm$  SEM. \* $p < 0.05$ , \*\* $p < 0.01$  (Student's *t* test).

Table S1. Primers used in plasmid construction and qRT-PCR

| Gene       | Accession no. | Forward primer             | Reverse primer           |
|------------|---------------|----------------------------|--------------------------|
| T7-BmSTING | XM_021346487  | TAATACGACTCACTATAGGGTCCGAC | TAATACGACTCACTATAGGGAGTC |

|              |                |                            |                          |
|--------------|----------------|----------------------------|--------------------------|
|              |                | GGCTACAGAC                 | GTCTATGACCTCCTTT         |
| T7-DsRed     | XM_015901630   | TAATACGACTCACTATAGGGGTACGG | TAATACGACTCACTATAGGGGGTG |
|              |                | CTCCAAGGTGTACG             | TAGTCCTCGTTGTGGG         |
| BmSTING      | XM_021346487   | CGCGGATCCATGGCAGGCTTAAATG  | AAATATGCGGCCGCCAGATCCTCT |
| (HA tag)     |                | AGAC                       | TCTGAGATGAGTTTTT         |
| BmDredd      | NM_001114865   | GGAAGATCTATGTTTCGACCTGACGC | TAAGAATGCGGCCGCTCACTTATC |
| (FLAG tag)   |                | TTTA                       | GTCCGTCATCCTTGTAATC      |
| BmCasp8L     | XM_012697291.2 | CGCGGATCCATGGATTACAAGGATG  | AAATATGCGGCCGCTAACAACCTC |
| (FLAG tag)   |                | ACGACGATAAGCAATCTTCGAGTCC  | GCATGAAA                 |
|              |                | TGG                        |                          |
| BmSTING-RFP  | XM_021346487   | GCAGGCTTAAATGAGACTCATA     | CCCTCGAGTTAGTCACGTTCCCTG |
|              |                |                            | CT                       |
| BmRelish-RFP | NM_001102465   | TCTACAACCTGCCAGTGATC       | CCCTCGAGTTATAAGCTGGGTTGC |
|              |                |                            | TGCA                     |
| BmDredd-RFP  | NM_001114865   | TTTCGACCTGACGCT            | CCCTCGAGTCATGGCTTAAATAAG |
|              |                |                            | TAAAGT                   |
| BmSTING      | XM_021346487   | AGCCGTCAACCGTCACTT         | GAAAACCTACGAATCTGT       |
| (qPCR)       |                |                            |                          |
| BmCecA       | NM_001043997   | TCGCTTGCCCTATGACG          | TGAGCCCAGGTGGAAACT       |
| (qPCR)       |                |                            |                          |
| BmCecB       | NM_001043995.1 | CCTATCCTTCGTCTTCGCTCT      | TAGCTTTAGCCGAACCAAGG     |
| (qPCR)       |                |                            |                          |
| BmGloverin   | NM_001043465   | TCGCGATATTCACGACTTTG       | GCCTCCAGGCCCTAATACTC     |
| (qPCR)       |                |                            |                          |
| BmLysozyme   | NM_001043983   | GTGCATGAGCTGAGGAAACA       | AGTACCGGTCGTTGATCTGG     |
| (qPCR)       |                |                            |                          |
| BmRelish     | NM_001102465   | GTCGTTGTTCCGGGCGTCC        | TCCACACGCGGTGGCCATTC     |
| (qPCR)       |                |                            |                          |
| BmCasp8L     | XM_012697291.2 | TTGGCAATGGAATAAACGC        | GTGCTTCTCCGAAATAGGG      |



---

(qPCR)

---

|       |                |                        |                       |
|-------|----------------|------------------------|-----------------------|
| GAPDH | XM_012694444.2 | CATTCCGCGTCCTGTTGCTAAT | GCTGCCTCCTTGACCTTTTGC |
|-------|----------------|------------------------|-----------------------|

---

(qPCR)

---

|      |          |                     |                   |
|------|----------|---------------------|-------------------|
| GP64 | AB253773 | CCATCGTGGAGACGGACTA | CTCGCACTGCTGCCTGA |
|------|----------|---------------------|-------------------|

---

(qPCR)

---

|             |              |                          |                          |
|-------------|--------------|--------------------------|--------------------------|
| sgBmSTING-1 | XM_021346487 | AAGTGCATGCGCAATGTAGGCGTG | AAACCACGCCTACATTGCGCATGC |
|-------------|--------------|--------------------------|--------------------------|

---

|             |              |                          |                          |
|-------------|--------------|--------------------------|--------------------------|
| sgBmSTING-2 | XM_021346487 | AAGTGATATAAAATAATTAATAAT | AAACATTATTAATTATTTTATATC |
|-------------|--------------|--------------------------|--------------------------|

---

|             |              |                         |                          |
|-------------|--------------|-------------------------|--------------------------|
| sgBmSTING-3 | XM_021346487 | AAGTGAAAACGAAAATCAAAAAA | AAACTTTTTTGATTTTCAGTTTTC |
|-------------|--------------|-------------------------|--------------------------|

---
